# Supplementary material for: Distraction Therapy to Correct Trismus Following Noma
Source: PubMed Central journal article supplement — J Craniofac Surg. 2020 Jan 20;31(2):488–91. doi: 10.1097/SCS.0000000000006082 (PMC7329206; doi:10.1097/scs.0000000000006082), 2020-01-20
Supplement: jcrsu-31-488-s001.pdf [file jcrsu-31-488-s001.pdf]

| NR.               | Name, Age     | ECART<br>apre`s<br>ablation<br>distracter | ECART<br>2 semaines<br>apre`s | ECART<br>1 mois<br>apre`s | ECART<br>3 mois<br>apre`s | ECART<br>6 mois<br>apre`s | ECART<br>12 mois<br>apre`s | ECART<br>36,48,60 mois<br>aptr`s | month<br>after surgery     |
|-------------------|---------------|-------------------------------------------|-------------------------------|---------------------------|---------------------------|---------------------------|----------------------------|----------------------------------|----------------------------|
| 1                 | A.M., f 26a   | 2,9                                       | 3                             | 3                         | 2,8                       | 2                         |                            | 0                                | 48 month, jaw deformity    |
| 2                 | A.O: f 10a    | 2,8                                       | 3                             | 3                         | 3                         | 3                         | 3                          |                                  |                            |
| 3                 | A.Z. f        | 3                                         | 3                             | 3                         | 3                         | 3                         |                            | 1,4                              | 60 month, after flap surg. |
| 4                 | A.A.M.m       | 2,85                                      | 3                             | 3                         |                           |                           |                            |                                  |                            |
| 5                 | A.A. m        | 3                                         | 3                             | 3                         | 3                         | 5                         | 6                          | 6,5                              | 48 month,                  |
| 6                 | A.F.A. f, 25a | 2,8                                       | 3                             |                           |                           |                           |                            | 0                                | 60 month, no leason        |
| 7                 | B.I.m, 20a    | 3                                         | 3,2                           | 3,2                       | 3,2                       | 4,5                       |                            |                                  |                            |
| 8                 | D.H.m 6a      | 2,8                                       | 3                             |                           |                           |                           |                            | 1,5                              | 60 month, after flap surg  |
| 9                 | H.H. f 14a    | 2,8                                       | 3                             |                           | 1                         | 1,05                      |                            | 1,3                              | 60 month, after flap surg  |
| 10                | H.S.m, 6a     | 1,4                                       | 1,4                           | 1,6                       | 1                         | 1,8                       |                            | 0,5                              | 60 month, defect cheek     |
| 11                | H.G. f 15     | 1                                         | 1                             | 1                         |                           |                           |                            | 0,6                              | 48 month, after flap surg  |
| 12                | H.M., f, 25a  | 2,7                                       | 2,7                           | 2,75                      |                           |                           |                            |                                  |                            |
| 13                | K.M. m, 13a   | 3                                         | 3                             | 3                         | 3                         | 5                         | 4,5                        |                                  |                            |
| 14                | M.S. m        | 1                                         | 1,25                          | 1,25                      | 1,25                      |                           |                            | 1,8                              | 48 month, after flap surg  |
| 15                | N.S. m, 13a   | 3                                         | 3                             | 3                         | 3                         | 3                         |                            | 0                                | 48 month, no defect        |
| 16                | N.I.f, 11a    | 1,85                                      | 1,8                           |                           |                           |                           |                            | 0                                | 60 month                   |
| 17                | O.H. f, 8a    | 3                                         | 3                             | 3                         | 6                         | 6                         | 6                          | 7                                | 48 months scar eyelid      |
| 18                | R.S. f, 16a   | 3                                         | 3                             | 2                         | 2                         |                           |                            | 1,5                              | 60 month, jaw deformity    |
| 19                | R.I. f, 15a   | 3                                         | 3                             |                           |                           |                           |                            | 1,2                              | 48 month no leason         |
| 20                | R.A. f, 5a    | 2                                         | 2                             | 2                         | 2                         |                           |                            | 0,2                              | 48 month, after flap surg  |
| 21                | R.I.f, 16a    | 2,7                                       | 2,7                           | 2,7                       | 2,7                       | 2,7                       | 2,7                        | 2,1                              | 60 month, no defect        |
| 22                | S.S. f, 23a   | 3                                         | 3                             | 4,5                       | 4,5                       | 4,5                       | 3,5                        |                                  |                            |
| 23                | S.M. f        | 2,5                                       | 0,65                          |                           |                           |                           |                            |                                  |                            |
| 24                | S.M. m        | 2,7                                       | 2,8                           | 2,8                       | 2,8                       | 2,8                       |                            | 0,15                             | 60 month, after flap surg  |
| 25                | S.O. f        | 3                                         | 3                             | 3                         | 4                         | 4                         |                            |                                  |                            |
| 26                | S.I. f        | 2                                         | 2,9                           |                           |                           |                           |                            |                                  |                            |
| 27                | T.I. f        | 2,8                                       | 3                             | 3                         |                           |                           |                            | 1,8                              | 36 month                   |
| 28                | Y.Z. m, 25a   | 2,8                                       | 2                             |                           |                           | 2                         |                            |                                  |                            |
| 29                | Y.Z.f         | 2,9                                       | 2,9                           | 2,9                       | 2,9                       | 2,9                       | 1,4                        | 1,4                              | 48 month                   |
| 30                | Y.A.          | 2                                         | 1,8                           | 1                         | 0,4                       | 0,1                       |                            | 0,3                              | 36 month, after flap surg  |
| 31                | Z.M.          | 3                                         | 3                             | 3                         | 3                         | 3,5                       | 3                          |                                  |                            |
| 32                | Z.S. f, 12a   | 3                                         | 3                             | 3                         | 3                         | 5                         | 5,5                        |                                  |                            |
| 33                | Z.I.f, 7a     | 2,3                                       | 2,5                           |                           | 0,6                       | 0,8                       |                            | 0                                | 60 month, no leason        |
| 34                | Z.A. f, 9a    | 2,65                                      | 2,65                          | 2                         | 2                         | 2                         |                            |                                  |                            |
| 35                | Z.S. m        | 3                                         | 3                             |                           |                           | 1,1                       |                            | 3                                | 60 month, flap surg        |
| 36                | M.H. m        | 2,85                                      | 3                             |                           |                           |                           |                            |                                  |                            |
| 37                | S.A. f        | 2,8                                       | 2,8                           |                           |                           |                           |                            |                                  |                            |
| 38                | K.K. f        | 3                                         | 3,5                           |                           |                           |                           |                            |                                  |                            |
| 39                | M.I. f        | 3                                         | 4                             |                           |                           |                           |                            |                                  |                            |
| 40                | B.I. f, 25a   | 3                                         | 3                             | 4,5                       |                           |                           |                            |                                  |                            |
|                   |               | 105,9                                     | 107,55                        | 70,2                      | 60,15                     | 65,75                     | 35,6                       | 32,25                            |                            |
| <b>Number</b>     |               | <b>40</b>                                 | <b>40</b>                     | <b>26</b>                 | <b>23</b>                 | <b>22</b>                 | <b>9</b>                   | <b>22</b>                        |                            |
| <b>Mean Value</b> |               | <b>2,65</b>                               | <b>2,69</b>                   | <b>2,70</b>               | <b>2,62</b>               | <b>2,99</b>               | <b>3,96</b>                | <b>1,47</b>                      |                            |

Tab. S1 Follow-up measurements of mouth opening after distraction of 40 patients up to 60 month in 8 cases. The fragmentary members of value depends on the local inconsistency of local staff availability and missing

|                      | post<br>OP | 2 wks | 1 mo | 3 mo | 6 mo | 1 yr | 3 yrs | 4 yrs | 5 yrs | last<br>(3-5 yrs) |
|----------------------|------------|-------|------|------|------|------|-------|-------|-------|-------------------|
| <b>n</b>             | 40.0       | 39.0  | 27.0 | 25.0 | 22.0 | 9.0  | 2.0   | 8.0   | 12.0  | 22.0              |
| <b>&gt; 0mm (%)</b>  | 100.0      | 97.5  | 67.5 | 62.5 | 55.0 | 22.5 | 5.0   | 15.0  | 22.5  | 42.5              |
| <b>&gt; 7mm (%)</b>  | 100.0      | 95.0  | 67.5 | 57.5 | 52.5 | 22.5 | 2.5   | 10.0  | 17.5  | 30.0              |
| <b>&gt; 11mm (%)</b> | 100.0      | 97.5  | 67.5 | 62.5 | 52.5 | 22.5 | 5.0   | 15.0  | 22.5  | 42.5              |
| <b>mean (cm)</b>     | 2.7        | 2.7   | 2.7  | 2.4  | 3.0  | 4.0  | 1.1   | 1.5   | 1.5   | 1.5               |
| <b>sd (cm)</b>       | 0.5        | 0.6   | 0.8  | 1.0  | 1.6  | 1.6  | 1.1   | 2.1   | 2.0   | 1.9               |
| <b>t (H0: mu=0)</b>  | 32.2       | 27.0  | 16.5 | 11.9 | 8.9  | 7.3  | 1.4   | 1.9   | 2.7   | 3.6               |
| <b>df</b>            | 39.0       | 38.0  | 26.0 | 24.0 | 21.0 | 8.0  | 1.0   | 7.0   | 11.0  | 21.0              |
| <b>p-value</b>       | 0.0        | 0.0   | 0.0  | 0.0  | 0.0  | 0.0  | 0.4   | 0.1   | 0.0   | 0.0               |

Table S2 shows the proportions of mouth opening exceeding 0, 7, and 11mm, the average mouth opening (along with the respective SDs) and the according results of the one-sample t-tests ( $H_0: \mu=0$ ). We find all (but the 3 and 4 years FUP) means significantly larger than zero. At the end of distraction 100% of all patients had a mouth opening of over 1,1cm, and 3 to 5 years afterwards 42,5 % had a MO of more than 1,1cm.

The values of the measurements of the single years 1-5 marked in red in the table are not statistically significant due to the fragmentary members of values. They are there for misunderstanding
